# Supplementary material
Source: MDPI journal article supplement (https://www.mdpi.com/2072-4292/14/15/3554)
Supplement: s1 [file s1]

# NDVI-LAI equation library API

## *Documentation for Editorial process*

## Contents

---

|                                              |   |
|----------------------------------------------|---|
| The equation library .....                   | 2 |
| Brief description .....                      | 2 |
| Input/output data .....                      | 2 |
| API Portal registration and Model Call ..... | 2 |
| API Portal registration step-by-step .....   | 2 |
| API Configuration and Call .....             | 5 |

# The equation library

---

## Brief description

The library provides an overview of NDVI-LAI conversion methods available in literature since 2017. Methods were categorized by the sensor they were derived from, the crop they refer to, and the biome of the experimental field. Algorithms included in the library are fully documented at <https://doi.org/10.6084/m9.figshare.20359437.v2>

Available methods refer to field crops for now, but the library can be further extended to other land cover and be fed with other remote sensing products. The croplands under investigations so far were: wheat, maize, barley, rice, vineyard, soybean, eucalypt, sunflower, sugarcane, pasture, forests, poplar plantations and mixed land cover.

## Input/output data

Table S1. Input variables for the equations

| Variable Name | Unit     | Description                            |
|---------------|----------|----------------------------------------|
| NDVI          | unitless | Normalized Difference Vegetation Index |

Table S2. Output variables of the library

| Variable Name | Unit     | Description     |
|---------------|----------|-----------------|
| LAI           | unitless | Leaf area index |

# API Portal registration and Model Call

---

## API Portal registration step-by-step

1. Register at the URL: <https://developer.progettoagridigit.it>

**IMPORTANT: please use an anonymous email address: we do not want to know your identity as a Reviewer of our papers! In addition, please use fake First and Last name in the form as in the Figure below.**

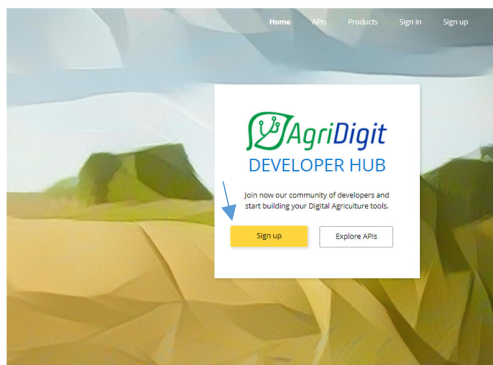

## Sign up

Already a member? [Sign in.](#)

Email

Password

Confirm password

First name

Last name

2. Once you have registered, you will receive an email at your anonymous email address. Click on the link in the email for validation, then, by using the email address you used at point 1, write an email to [saas\\_admin@crea.gov.it](mailto:saas_admin@crea.gov.it), mentioning this code 854YBU58ZQ4JWCKYXC3HMSS (a unique key we have generated for this paper, to be kept confidential) and asking to be promoted to the "Peer Reviewer" user group.
3. You will receive an email from CREA where we confirm your subscription to the "Peer Reviewer" group.
4. Once you have received the email, Sign in at the url: <https://developer.progettoagridigit.it> and click on the button "Products".

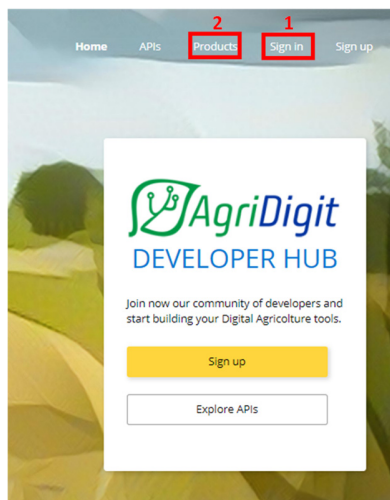

5. You will see a new product named "Models for Peer Reviewers". Click on it, give a name to the subscription that's meaningful to you and click on subscribe. Important: by clicking on subscribe you accept the Terms of Use.

## Products

 Search products

| Name                      | Description                                                                                  |
|---------------------------|----------------------------------------------------------------------------------------------|
| Models for Peer Reviewers | List of Models cited as RESTful APIs in papers under review                                  |
| Starter                   | Subscribers will be able to run 5 calls/minute up to a maximum of 100 calls/week.            |
| Unlimited                 | Subscribers have completely unlimited access to the API. Administrator approval is required. |

### Your subscriptions

You don't have subscriptions yet.

PeerReviewer

☒ I agree to the Terms of Use. [Hide](#)

Subscribe

PLEASE READ THIS END USER LICENCE AGREEMENT CAREFULLY. This End User License Agreement ("EULA") governs your use of the "Models for Peer Reviewers" (the "Product") currently provided or which will be provided by CONSIGLIO PER LA RICERCA IN AGRICOLTURA E L'ANALISI DELL'ECONOMIA AGRARIA - AGRICOLTURA E AMBIENTE ("CREA-AA"). This EULA sets out the basis on which CREA-AA makes the Products available to you ("User" or "You") and on which You may use them. By using the Product, You agree to accept and to be bound by this EULA at all times. If You do not agree with this, please do not use the Product.

CREA-AA reserves the right to change, modify, add or delete articles in this EULA at any time.

1. GRANT OF LICENSE.

1.1 CREA-AA grants You a non-exclusive, non-transferable, non-sublicensed, non-commercial and personal license to use the Product (in whole or in part) and any Product (the "License"), for such time until either You or CREA-AA terminates this EULA. You must in no event use, nor allow others to use the Product or this License for commercial purposes without obtaining a license to do so from CREA-AA. THIS PRODUCT IS

- You will see a "subscription details" screen. Copy and keep safe the keys, as they will be used to invoke CREA's APIs. They can be regenerated at any time from your account.

## User profile

### Account details

Email [alfredoarmandoarturo@libero.it](#)  
First name [Fake](#)  
Last name [Reviewer](#)  
Registration date [02/12/2021](#)

[Change name](#)

[Change password](#)

[Close account](#)

### Subscriptions

| Subscription details |                                  | Product                                           | State                     | Action                           |
|----------------------|----------------------------------|---------------------------------------------------|---------------------------|----------------------------------|
| Name                 | PeerReviewer                     | <a href="#">Rename</a>                            | Models for Peer Reviewers | Submitted <a href="#">Cancel</a> |
| Requested on         | 02/12/2021                       |                                                   |                           |                                  |
| Primary key          | a5430775fb964813958fb6a0b448a217 | <a href="#">Hide</a>   <a href="#">Regenerate</a> |                           |                                  |
| Secondary key        | ba796d699a5d410a9ef79eb00961a4dd | <a href="#">Hide</a>   <a href="#">Regenerate</a> |                           |                                  |

- You will receive an email confirming your subscription activation. You can now use the NDVI-LAI conversion library.

## API Configuration and Call

Among the submission items you will find the file "MaizeANDTemperate.json" (and other five API configuration files that allow you to replicate data shown in Figure 5 of the paper), that is already filled with NDVI data and can be directly used to test the API.

Prepare an HTTP POST request (with Postman - <https://www.postman.com/> - or a similar tool), fill in the url:

<https://api.progettoagridigit.it/model/v1/ModelExecution>

Go to the "Headers" section, add as key Ocp-Apim-Subscription-Key and as value the primary key you activated when your subscription was approved.

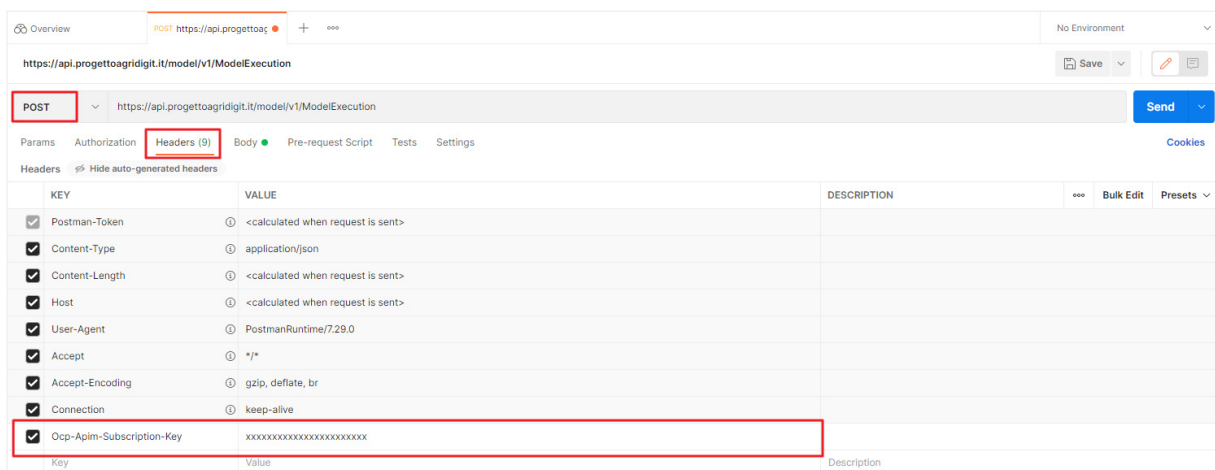

Go to the "Body" section, and click on "raw"

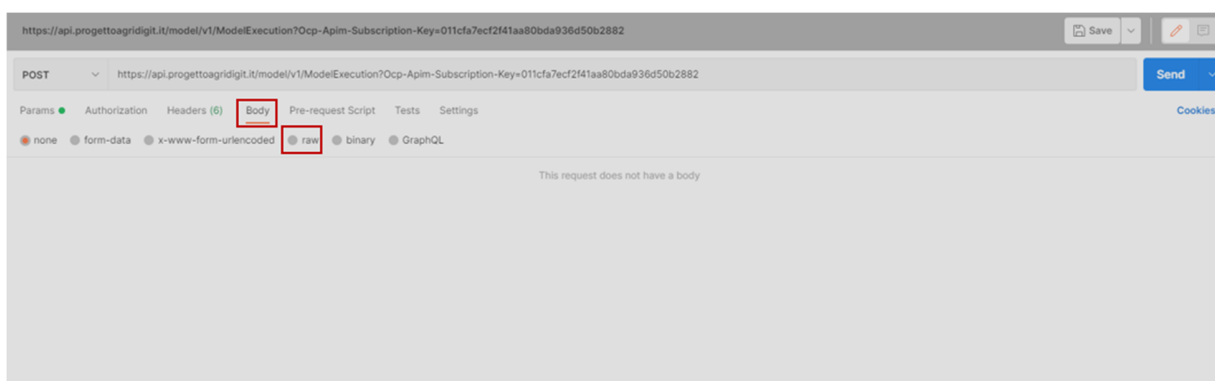

Change the format from "Text" to "JSON"

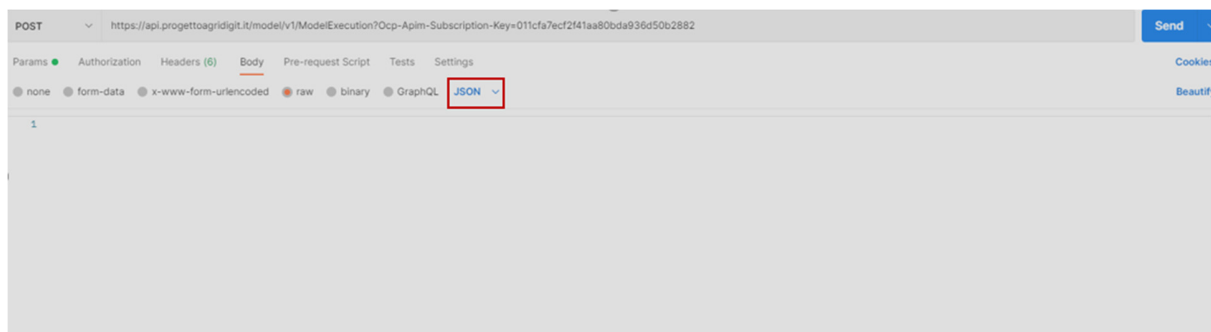

In the body section copy the content of file "MaizeANDTemperate.json" (use other configurations for other use case scenarios)

Trigger the HTTP POST request (click on "SEND" button in Postman). Allow for some seconds for the answer.

To run the library with your own NDVI data, use a json template like the one shown in the attached file: "NDVILAI\_template.json". Here, near the "SatelliteData" key inside the "SatelliteDataProvider" element, there is a placeholder. NDVI data must be copied to replace <placeholder\_satellitedata> with the code reported in the file "SatelliteDataExample.json".

In the latter file each record contains a single NDVI value accompanied by location and date of the observation. Records are delimited by curly brackets and separated from each other by commas.

Substitute the placeholder <placeholder\_satellitedata > with the list obtained in last step.

To be sure of what you did, we strongly recommend that you pass the Json created in the last step into a Json validator

The final json obtained in last step is ready to be used in the body of a the HTTP POST request to the URL:

<https://api.progettoagridigit.it/model/v1/ModelExecution>

Don't forget to put in your HTTP POST request the header with your product activation key that you received when your subscription was approved.

The header must have the label: Ocp-Apim-Subscription-Key and as value the key you have received.

API call enables users to query the software library for single functions or multiple function attributes (crop, sensor, biome, platform, spatial resolution). To configure a query, the user must replace/introduce the items of interest in the lists of the elements: "Crops", "Sensors", "Biomes",

"Platforms", "Resolutions", "CropTypes" available in the sample API call json files as shown here below:

```

96     },
97     "Crops": [
98     ],
99     "Sensors": [
100    ],
101    "Biomes": [
102      "Temperate_Broadleaf_Mixed_Forests",
103      "Temperate_Grasslands_Savannas_Shrublands"
104    ],
105    "Platforms": [
106    ],
107    "Resolutions": [
108      "High"
109    ],
110    "CropTypes": [
111      "PerennialCrop",
112      "SummerCrop",
113      "WinterCrop"
114    ],

```

Available items grouped by category are reported below:

- The filter StrategiesToRun can be invoked with values
  - NDVItoLAI\_Sanchez\_et\_al\_2012,
  - NDVItoLAI\_Berni\_et\_al\_2009,
  - NDVItoLAI\_Godwa\_et\_al\_2016\_a,
  - NDVItoLAI\_Godwa\_et\_al\_2016\_b,
  - NDVItoLAI\_Thiongo\_et\_al\_2016
  - NDVItoLAI\_Timmermans\_et\_al\_2013\_b
  - NDVItoLAI\_Timmermans\_et\_al\_2013\_c
  - NDVItoLAI\_Wiatrak\_et\_al\_2010\_a
  - NDVItoLAI\_Wiatrak\_et\_al\_2010\_b
  - NDVItoLAI\_Afrasiabian\_et\_al\_2020\_a
  - NDVItoLAI\_Afrasiabian\_et\_al\_2020\_b
  - NDVItoLAI\_Afrasiabian\_et\_al\_2020\_c
  - NDVItoLAI\_Afrasiabian\_et\_al\_2020\_d
  - NDVItoLAI\_Lopez\_Lozano\_et\_al\_2010
  - NDVItoLAI\_Caruso\_et\_al\_2017
  - NDVItoLAI\_Colombo\_et\_al\_2003
  - NDVItoLAI\_Johnson\_et\_al\_2001
  - NDVItoLAI\_Johnson\_et\_al\_2003
  - NDVItoLAI\_Towers\_et\_al\_2019\_a
  - NDVItoLAI\_Towers\_et\_al\_2019\_b
  - NDVItoLAI\_Baez\_Gonzalez\_et\_al\_2005
  - NDVItoLAI\_Diker\_Bausch\_2003\_a
  - NDVItoLAI\_Diker\_Bausch\_2003\_b
  - NDVItoLAI\_Fei\_et\_al\_2012
  - NDVItoLAI\_Guindin\_Garcia\_et\_al\_2012\_a
  - NDVItoLAI\_Guindin\_Garcia\_et\_al\_2012\_b
  - NDVItoLAI\_Guindin\_Garcia\_et\_al\_2012\_c
  - NDVItoLAI\_Hong\_et\_al\_2004
  - NDVItoLAI\_Huang\_et\_al\_2018\_a
  - NDVItoLAI\_Huang\_et\_al\_2018\_b
  - NDVItoLAI\_Jayasree\_et\_al\_2013
  - NDVItoLAI\_Jinling\_et\_al\_2009\_b

NDVItoLAI\_Jin\_et\_al\_2016  
 NDVItoLAI\_Kim\_et\_al\_2012\_a  
 NDVItoLAI\_Kim\_et\_al\_2012\_b  
 NDVItoLAI\_Kim\_et\_al\_2012\_c  
 NDVItoLAI\_Kim\_et\_al\_2012\_d  
 NDVItoLAI\_Kim\_et\_al\_2012\_e  
 NDVItoLAI\_Kim\_et\_al\_2012\_f  
 NDVItoLAI\_Kim\_et\_al\_2012\_g  
 NDVItoLAI\_Kim\_et\_al\_2012\_h  
 NDVItoLAI\_Kross\_et\_al\_2015  
 NDVItoLAI\_Li\_et\_al\_2017  
 NDVItoLAI\_Nguy\_Robertson\_et\_al\_2014\_a  
 NDVItoLAI\_Ramos\_et\_al\_2018  
 NDVItoLAI\_Soria\_et\_al\_2012  
 NDVItoLAI\_Thomason\_et\_al\_2007  
 NDVItoLAI\_Timmermans\_et\_al\_2013\_a  
 NDVItoLAI\_Toureiro\_et\_al\_2017  
 NDVItoLAI\_Vincini\_et\_al\_2007  
 NDVItoLAI\_Wilson\_Meyer\_2007  
 NDVItoLAI\_Vina\_et\_al\_2011  
 NDVItoLAI\_Xavier\_Vettorazzi\_2004\_a  
 NDVItoLAI\_Xavier\_Vettorazzi\_2004\_b  
 NDVItoLAI\_Xavier\_Vettorazzi\_2004\_c  
 NDVItoLAI\_Xavier\_Vettorazzi\_2004\_d  
 NDVItoLAI\_Xia\_et\_al\_2016  
 NDVItoLAI\_Xie\_et\_al\_2018  
 NDVItoLAI\_Yan\_Li\_et\_al\_2014\_a  
 NDVItoLAI\_Yan\_Li\_et\_al\_2014\_b  
 NDVItoLAI\_Yan\_Li\_et\_al\_2014\_c  
 NDVItoLAI\_Yan\_Li\_et\_al\_2014\_d  
 NDVItoLAI\_Yan\_Li\_et\_al\_2014\_e  
 NDVItoLAI\_Yonah\_et\_al\_2018\_a  
 NDVItoLAI\_Yonah\_et\_al\_2018\_b  
 NDVItoLAI\_Yueting\_et\_al\_2008\_b  
 NDVItoLAI\_Cheng\_et\_al\_2007\_a  
 NDVItoLAI\_Cheng\_et\_al\_2007\_b  
 NDVItoLAI\_Guo\_et\_al\_2012\_a  
 NDVItoLAI\_Guo\_et\_al\_2012\_b  
 NDVItoLAI\_Kimura\_et\_al\_2004  
 NDVItoLAI\_Kulkarni\_Honda\_2020  
 NDVItoLAI\_Lee\_et\_al\_2017\_a  
 NDVItoLAI\_Lee\_et\_al\_2017\_b  
 NDVItoLAI\_Lee\_et\_al\_2017\_c  
 NDVItoLAI\_Liu\_et\_al\_2017  
 NDVItoLAI\_Maki\_Homma\_2014  
 NDVItoLAI\_Raksapatcharawong\_et\_al\_2020\_a  
 NDVItoLAI\_Raksapatcharawong\_et\_al\_2020\_b  
 NDVItoLAI\_Ryu\_et\_al\_2020  
 NDVItoLAI\_Wang\_et\_al\_2007  
 NDVItoLAI\_Wu\_et\_al\_2016  
 NDVItoLAI\_Zhang\_et\_al\_2019\_a  
 NDVItoLAI\_Trepos\_et\_al\_2020  
 NDVItoLAI\_Tunca\_et\_al\_2018  
 NDVItoLAI\_Bochenek\_et\_al\_2017\_a  
 NDVItoLAI\_Bochenek\_et\_al\_2017\_b  
 NDVItoLAI\_Chahbi\_et\_al\_2014  
 NDVItoLAI\_Chattaraj\_et\_al\_2013  
 NDVItoLAI\_Chaurasia\_et\_al\_2011\_a

NDVItoLAI\_Chaurasia\_et\_al\_2011\_b  
NDVItoLAI\_Chaurasia\_et\_al\_2011\_c  
NDVItoLAI\_Chaurasia\_et\_al\_2011\_d  
NDVItoLAI\_Chaurasia\_et\_al\_2011\_e  
NDVItoLAI\_Chaurasia\_et\_al\_2011\_f  
NDVItoLAI\_Diarra\_et\_al\_2017  
NDVItoLAI\_Dong\_et\_al\_2013  
NDVItoLAI\_Dong\_et\_al\_2015  
NDVItoLAI\_Duchemin\_et\_al\_2006  
NDVItoLAI\_Fu\_et\_al\_2020  
NDVItoLAI\_Hadria\_et\_al\_2006  
NDVItoLAI\_Heinzel\_et\_al\_2005  
NDVItoLAI\_Huang\_et\_al\_2015\_a  
NDVItoLAI\_Jiang\_et\_al\_2018\_a  
NDVItoLAI\_Jiang\_et\_al\_2018\_b  
NDVItoLAI\_Jiang\_et\_al\_2018\_c  
NDVItoLAI\_Jiang\_et\_al\_2018\_d  
NDVItoLAI\_Jinling\_et\_al\_2009\_a  
NDVItoLAI\_Ji\_et\_al\_2021  
NDVItoLAI\_Kaur\_et\_al\_2017  
NDVItoLAI\_Kokhan\_Vostokov\_2020\_a  
NDVItoLAI\_Kokhan\_Vostokov\_2020\_b  
NDVItoLAI\_Lelong\_et\_al\_2008  
NDVItoLAI\_Liu\_et\_al\_2018  
NDVItoLAI\_Martinez\_et\_al\_2010  
NDVItoLAI\_Mokhtari\_et\_al\_2018  
NDVItoLAI\_Lu\_et\_al\_2005  
NDVItoLAI\_Nguy\_Robertson\_et\_al\_2014\_b  
NDVItoLAI\_Padilla\_et\_al\_2012  
NDVItoLAI\_Rodriguez\_et\_al\_2004  
NDVItoLAI\_Roumenina\_et\_al\_2013\_a  
NDVItoLAI\_Roumenina\_et\_al\_2013\_b  
NDVItoLAI\_Schonert\_et\_al\_2015  
NDVItoLAI\_Sultana\_et\_al\_2014\_a  
NDVItoLAI\_Sultana\_et\_al\_2014\_b  
NDVItoLAI\_Sun\_et\_al\_2018  
NDVItoLAI\_Tang\_et\_al\_2005  
NDVItoLAI\_Tan\_et\_al\_2020\_a  
NDVItoLAI\_Tan\_et\_al\_2020\_b  
NDVItoLAI\_Tan\_et\_al\_2020\_c  
NDVItoLAI\_Tan\_et\_al\_2020\_d  
NDVItoLAI\_Tan\_et\_al\_2020\_e  
NDVItoLAI\_Tan\_et\_al\_2020\_f  
NDVItoLAI\_Tripathi\_et\_al\_2013  
NDVItoLAI\_Verger\_et\_al\_2011  
NDVItoLAI\_Wu\_2014\_a  
NDVItoLAI\_Wu\_2014\_b  
NDVItoLAI\_Wu\_2014\_c  
NDVItoLAI\_Wu\_2014\_d  
NDVItoLAI\_Wu\_2014\_e  
NDVItoLAI\_Wu\_et\_al\_2010\_b  
NDVItoLAI\_Wu\_et\_al\_2010\_a  
NDVItoLAI\_Xie\_et\_al\_2015  
NDVItoLAI\_Yueting\_et\_al\_2008\_a  
NDVItoLAI\_Zhang\_et\_al\_2006  
NDVItoLAI\_Zhang\_et\_al\_2019\_b  
NDVItoLAI\_Zhao\_et\_al\_2012

- The filter Crops can be invoked with values
  - Barley
  - Eucalypt
  - Forest
  - Maize
  - MixedLandCover
  - Pasture
  - Poplar
  - Rice
  - Soybean
  - Sugarcane
  - Sunflower
  - Vineyard
  - Wheat
- The filter Sensors can be invoked with values
  - AdvancedWideFieldSensor
  - AISA
  - ASD
  - AVHRR
  - BJ1
  - FieldHyperspectral
  - GeoEye1
  - GF1
  - GreenSeeker
  - HJ
  - Hyperion
  - IKONOS
  - Landsat
  - MODIS
  - MultispectralCamera
  - Pleiades1A
  - PortableSpectroradiometer
  - PROBAV
  - PushbroomHyperspectralImager
  - Quickbird
  - RapidEye
  - RapidScan
  - Sentinel2
  - SPOT
  - SPOTVGT
  - UAV
  - WorldView2
  - WorldView3
- The filter Biomes can be invoked with values
  - Deserts\_Xeric\_Shrublands
  - Mediterranean\_Forests\_Woodlands\_Scrub
  - Montane\_Grasslands\_Shrublands
  - Temperate\_Broadleaf\_Mixed\_Forests
  - Temperate\_Grasslands\_Savannas\_Shrublands
  - Tropical\_Subtropical\_Dry\_Broadleaf\_Forests
  - Tropical\_Subtropical\_Grasslands\_Savannas\_Shrublands
  - Tropical\_Subtropical\_Moist\_Broadleaf\_Forests
- The filter Platforms can be invoked with values

Airborne  
Field  
Satellite

- The filter CropTypes can be invoked with values  
WinterCrop  
PermanentCrop  
Forest  
SummerCrop  
MixedLandCover  
PerennialCrop
- The filter Resolutions can be invoked with values  
Low  
Moderate  
High  
VeryHigh

The user can retrieve all the categories available in the filters by setting the DocumentationCall element to true in any of the API sample calls provided and sending the request.
